# Supplementary material for: RPLAD3: anomaly detection of blackhole, grayhole, and selective forwarding attacks in wireless sensor network-based Internet of Things
Source: PeerJ Comput Sci. 2023 Mar 27;9:e1309. doi: 10.7717/peerj-cs.1309 (PMC10280629; doi:10.7717/peerj-cs.1309)
Supplement: Supplemental Information 2 [file peerj-cs-09-1309-s002.xlsx]

## Sheet: 11
Comparison Analysis	PDR	E2E Delay	Power Consumption	Energy Consumption
RPLAD3 Mobile attacker	0.9633	0.42	1.39	0.834
RPLAD3 Mobile victim	0.995	0.42	1.42	0.852
RPLAD3 Static Attacker	0.999	0.41	1.33	0.798
RPL Protocol	0.38	0.33	1.37	0.822

## Sheet: 10
Code	Nodes	Attackers	Distance	Error	RPL PDR	RPLAD3 PDR	Improvement
N10A1D30E0.1	10	1	30	0.1	0.46	0.98	0.52
N10A1D30E0.25	10	1	30	0.25	0.45	0.89	0.44
N10A3D30E0.1	10	3	30	0.1	0.4	0.94	0.54
N10A3D30E0.25	10	3	30	0.25	0.38	0.95	0.57
N10A1D40E0.1	10	1	40	0.1	0.47	0.99	0.52
N10A1D40E0.25	10	1	40	0.25	0.44	0.97	0.53
N10A3D40E0.1	10	3	40	0.1	0.41	0.93	0.52
N10A3D40E0.25	10	3	40	0.25	0.4	0.92	0.52
N20A2D30E0.1	20	2	30	0.1	0.42	0.93	0.51
N20A2D30E0.25	20	2	30	0.25	0.39	0.82	0.43
N20A5D30E0.1	20	5	30	0.1	0.35	0.95	0.6
N20A5D30E0.25	20	5	30	0.25	0.33	0.92	0.59
N20A2D40E0.1	20	2	40	0.1	0.44	0.98	0.54
N20A2D40E0.25	20	2	40	0.25	0.43	0.96	0.53
N20A5D40E0.1	20	5	40	0.1	0.37	0.95	0.58
N20A5D40E0.25	20	5	40	0.25	0.3	0.97	0.67
N40A2D30E0.1	40	2	30	0.1	0.38	0.88	0.5
N40A2D30E0.25	40	2	30	0.25	0.37	0.86	0.49
N40A6D30E0.1	40	6	30	0.1	0.33	0.915	0.585
N40A6D30E0.25	40	6	30	0.25	0.29	0.9	0.61
N40A2D40E0.1	40	2	40	0.1	0.39	0.96	0.57
N40A2D40E0.25	40	2	40	0.25	0.37	0.94	0.57
N40A6D40E0.1	40	6	40	0.1	0.24	0.97	0.73
N40A6D40E0.25	40	6	40	0.25	0.21	0.95	0.74

## Sheet: 9
					RPL Protocol				RPLAD3
No.	Nodes	Attacker nodes	Distance	Error	RPL PDR	RPL Delay	RPL Power	RPL Energy	RPLAD3 PDR	RPLAD3 Delay	RPLAD3 Power	RPLAD3 Energy
N10A1D30E0.1	10	1	30	0.1	0.46	0.19	0.63	0.378	0.98	0.21	0.88	0.528
N10A1D30E0.25	10	1	30	0.25	0.45	0.18	0.66	0.396	0.89	0.21	0.92	0.552
N10A3D30E0.1	10	3	30	0.1	0.4	0.11	0.66	0.396	0.94	0.19	0.91	0.546
N10A3D30E0.25	10	3	30	0.25	0.38	0.1	0.72	0.432	0.95	0.2	0.95	0.57
N10A1D40E0.1	10	1	40	0.1	0.47	0.21	0.79	0.474	0.99	0.29	1.04	0.624
N10A1D40E0.25	10	1	40	0.25	0.44	0.18	0.82	0.492	0.97	0.3	1.07	0.642
N10A3D40E0.1	10	3	40	0.1	0.41	0.12	0.81	0.486	0.93	0.31	1.06	0.636
N10A3D40E0.25	10	3	40	0.25	0.4	0.11	0.89	0.534	0.92	0.38	1.13	0.678
N20A2D30E0.1	20	2	30	0.1	0.42	0.25	0.84	0.504	0.93	0.3	1.05	0.63
N20A2D30E0.25	20	2	30	0.25	0.39	0.23	0.88	0.528	0.82	0.25	1.1	0.66
N20A5D30E0.1	20	5	30	0.1	0.35	0.14	0.86	0.516	0.95	0.3	1.08	0.648
N20A5D30E0.25	20	5	30	0.25	0.33	0.12	0.95	0.57	0.92	0.3	1.16	0.696
N20A2D40E0.1	20	2	40	0.1	0.44	0.29	1.06	0.636	0.98	0.46	1.28	0.768
N20A2D40E0.25	20	2	40	0.25	0.43	0.26	1.08	0.648	0.96	0.55	1.29	0.774
N20A5D40E0.1	20	5	40	0.1	0.37	0.23	1.06	0.636	0.95	0.5	1.28	0.768
N20A5D40E0.25	20	5	40	0.25	0.3	0.26	1.12	0.672	0.97	0.5	1.34	0.804
N40A2D30E0.1	40	2	30	0.1	0.38	0.33	1.08	0.648	0.88	0.35	1.33	0.798
N40A2D30E0.25	40	2	30	0.25	0.37	0.29	1.12	0.672	0.86	0.28	1.39	0.834
N40A6D30E0.1	40	6	30	0.1	0.33	0.17	1.08	0.648	0.915	0.5	1.35	0.81
N40A6D30E0.25	40	6	30	0.25	0.29	0.14	1.16	0.696	0.9	0.33	1.41	0.846
N40A2D40E0.1	40	2	40	0.1	0.39	0.27	1.32	0.792	0.96	0.5	1.59	0.954
N40A2D40E0.25	40	2	40	0.25	0.37	0.26	1.34	0.804	0.94	0.5	1.61	0.966
N40A6D40E0.1	40	6	40	0.1	0.24	0.18	1.33	0.798	0.97	0.6	1.63	0.978
N40A6D40E0.25	40	6	40	0.25	0.21	0.15	1.37	0.822	0.95	0.5	1.64	0.984

## Sheet: 8
Attacker Type	PDR	E2E Delay	Power	TPR	FPR	Energy
Static Attacker	0.999	0.41	1.33	0.991736	0.000617856	0.798
Mobile attacker	0.9633	0.42	1.39	0.957447	0.000926498	0.834

## Sheet: 7
Attacker Type	PDR	E2E Delay	Power	TPR	FPR	Energy
Static Attacker	0.999	0.41	1.33	0.991736	0.000617856	0.798
Mobile attacker	0.9633	0.42	1.39	0.957447	0.000926498	0.834

## Sheet: 6
Attacker Type	PDR	E2E Delay	Power	TPR	FPR	Energy
Static Attacker	0.999	0.41	1.33	0.991736	0.000617856	0.798
Mobile attacker	0.9633	0.42	1.39	0.957447	0.000926498	0.834

## Sheet: 5
Attacker Type	PDR	E2E Delay	Power	TPR	FPR	Energy
Static Attacker	0.999	0.41	1.33	0.991736	0.000617856	0.798
Mobile attacker	0.9633	0.42	1.39	0.957447	0.000926498	0.834

## Sheet: 4
Attacker Type	PDR	E2E Delay	Power	TPR	FPR	Energy
Static Attacker	0.999	0.41	1.33	0.991736	0.000617856	0.798
Mobile attacker	0.9633	0.42	1.39	0.957447	0.000926498	0.834

## Sheet: 3
Attacker Type	PDR	E2E Delay	Power	TPR	FPR	Energy
Static Attacker	0.999	0.41	1.33	0.991736	0.000617856	0.798
Mobile attacker	0.9633	0.42	1.39	0.957447	0.000926498	0.834

## Sheet: 2
Scenario	window	thr	TPR	FPR			N	D	E%	A%	thr	w	Framework	Packet type	Packet transfer interval	Packet Size	Simulation time	Node type
1	1	0.4	0.994228	0.0105006	tw 1 with thr-PLR		20	30 m	0.1	0.1	variable	variable	Static Nodes	UDP	20second	40 bytes	1 hour (3600s)	Skymote
2	1	0.5	0.996954	0.000986193	tw 1 with thr
3	2	0.4	0.9942	0.000617684	tw 2 with thr-PLR
4	2	0.5	0.994475	0.00154416	tw 2 with thr
5	3	0.4	0.994475	0.000555899	tw 3 with thr-PLR
6	3	0.5	0.996667	0.00116757	tw 3 with thr

[truncated: 1 more sheets: 1]
